# Supplementary material
Source: Springer Nature journal article supplement (https://www.springermedizin.de/resource/supplementary/12943_2011_934_MOESM6_ESM.pdf/9551710)

## A. CypA silencing by oligonucleotides (M139)

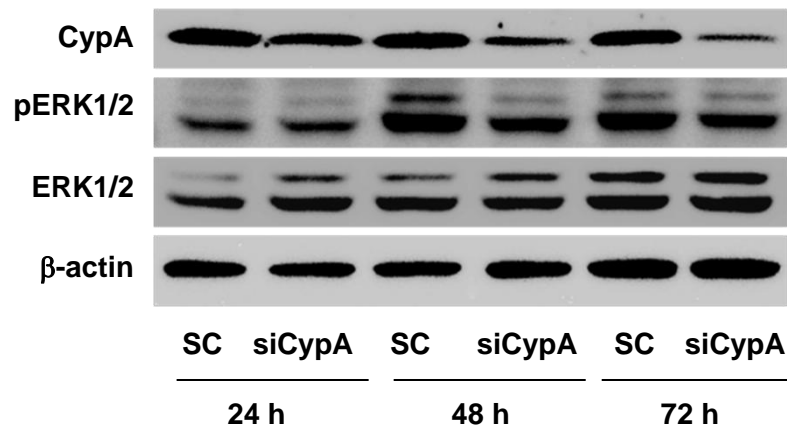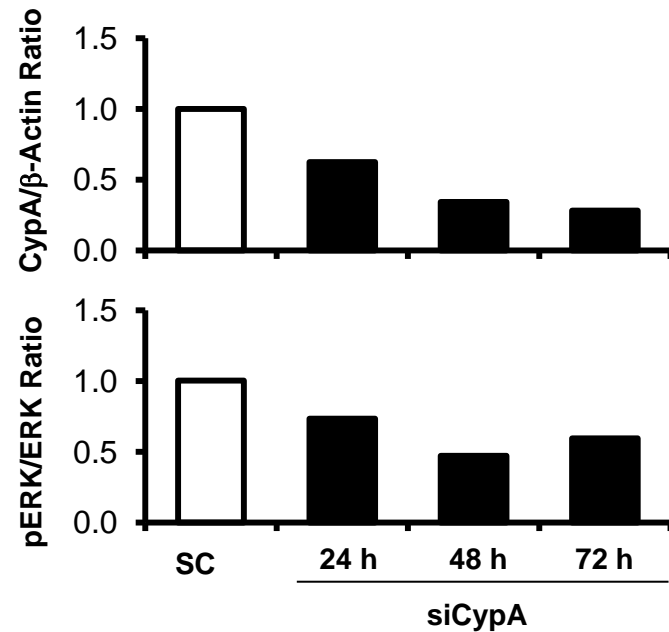

## B. Stable CypA silencing by lentiviral vector (M139)

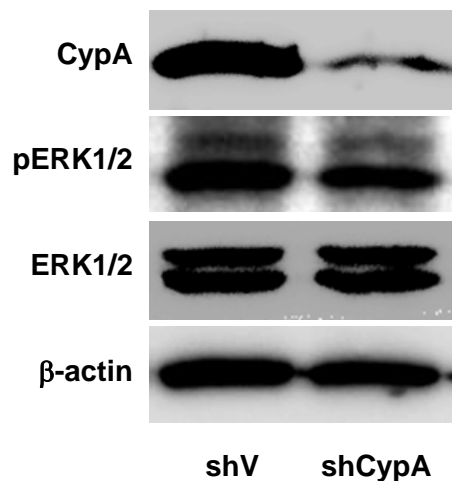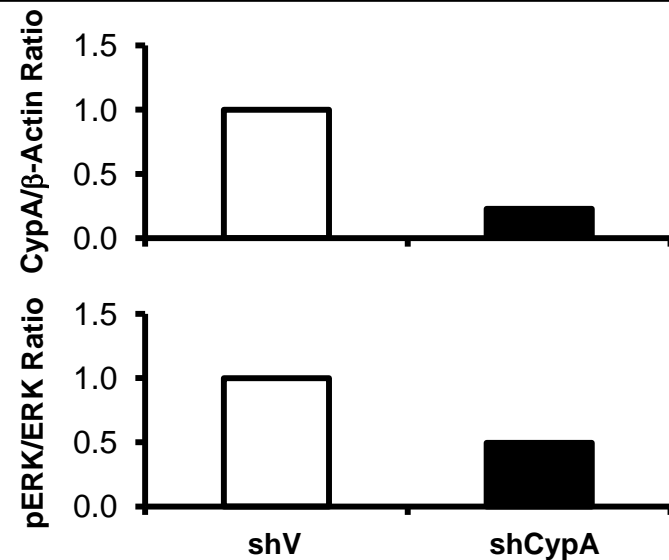

Supplement: MOESM6 [file 9551710]
